# Supplementary material
Source: Springer Nature journal article supplement (https://www.springermedizin.de/resource/supplementary/13075_2004_1362_MOESM3_ESM.pdf/9689606)

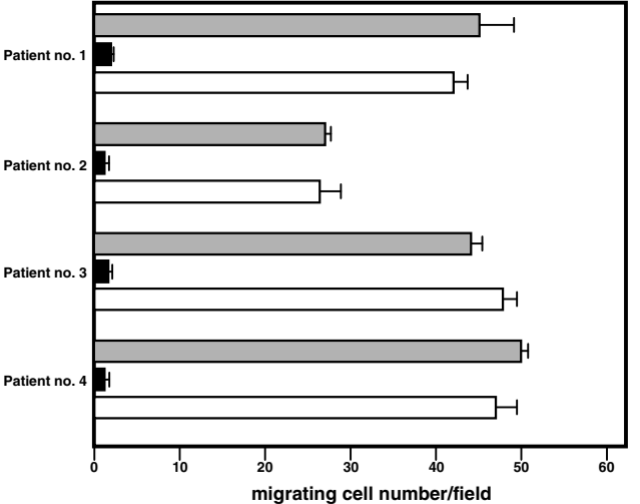

■ synovial    ■ synovial fluid +  $\alpha$ CXCL10    □ synovial fluid + unrelated mAb

Supplement: MOESM3 [file 9689606]
